## Methionine Prevents Nitrous Oxide-induced Teratogenicity in Rat Embryos Grown in Culture

Masahiko Fujinaga, M.D.,\* Jeffrey M. Baden, M.D.†

**Background:** Nitrous oxide ( $N_2O$ )-induced teratogenicity in rats is commonly believed to be due to decreased tetrahydrofolate, which results in decreased DNA synthesis. The role of decreased methionine has been largely ignored as have the sympathomimetic effects of  $N_2O$ .

**Methods:** A rat whole-embryo culture system was used to determine whether  $N_2O$ -induced teratogenicity can be prevented with supplemental methionine or folinic acid and whether  $N_2O$ -induced situs inversus is mediated by  $\alpha_1$ -adrenergic stimulation. Embryos were explanted on day 9 of gestation, and those at stage 10b (late primitive streak stage) were cultured with or without  $N_2O$  and the various chemicals, methionine ( $25 \mu g \cdot ml^{-1}$ ), folinic acid ( $5 \mu g \cdot ml^{-1}$ ), phenylephrine (range  $0.5$ – $50 \mu M$ ) and prazosin ( $10 \mu M$ ). Embryos in the  $N_2O$  groups were exposed to a concentration of 75% for the first 24 h of culture. After 50 h of culture, embryos were examined for abnormalities including situs inversus.

**Results:** Treatment with  $N_2O$  alone resulted in increased incidences of malformations and growth retardation. Methionine, but not folinic acid or prazosin, almost completely prevented  $N_2O$ -induced malformations and growth retardation.  $N_2O$  itself did not cause situs inversus but increased the incidence of phenylephrine-induced situs inversus. This additive effect was blocked by prazosin.

**Conclusions:** Our results indicate that decreased methionine rather than decreased tetrahydrofolate plays the major role in  $N_2O$ -induced teratogenicity in rats. They also indicate that  $N_2O$  stimulates the  $\alpha_1$ -adrenergic pathway in the embryo and thereby increases the incidence of phenylephrine-induced situs inversus. (Key words: Anesthetics, gases: nitrous oxide. Sympathetic nervous system: sympathomimetics. Toxicity: teratogenicity.)

\* Research Associate, Stanford University School of Medicine and Palo Alto Veterans Affairs Medical Center.

† Professor of Anesthesia, Stanford University School of Medicine; Chief of Anesthesiology Service, Palo Alto Veterans Affairs Medical Center.

Received from the Department of Anesthesia, Stanford University School of Medicine, Stanford, California, and Anesthesiology Service, Palo Alto Veterans Affairs Medical Center, Palo Alto, California 94304. Accepted for publication March 21, 1994. Supported by the March of Dimes Birth Defects Foundation and Veterans Administration.

Address reprint requests to Dr. Fujinaga: 3801 Miranda Avenue, 112A, Palo Alto, California 94304.

IN the late 1960s, Fink and Shepard<sup>1,2</sup> published their seminal work on the teratogenicity of nitrous oxide ( $N_2O$ ) in rats. Since then, many investigators have examined this phenomenon, yet, its mechanisms have remained elusive. A possible breakthrough occurred when anesthesiologists became aware that  $N_2O$  inhibited the enzyme methionine synthase, thereby decreasing the intracellular synthesis of both tetrahydrofolate and methionine.<sup>3</sup> Particular emphasis was placed on the decrease in tetrahydrofolate, which was known to lead to decreased DNA synthesis. However, *in vivo* studies have failed to show that supplementation with folates protects the offspring of rats from the effects of  $N_2O$ .<sup>4,5</sup> The protective effects of methionine supplementation has not been investigated. More recently, the sympathomimetic effects of  $N_2O$  have also received attention as a possible cause of some malformations, especially situs inversus which is known to be caused by  $\alpha_1$ -adrenergic agonists.<sup>6-8</sup>

We have established a rat whole-embryo culture model to assist in examining the mechanisms of  $N_2O$ -induced teratogenicity.<sup>9-11</sup> This model has several advantages over *in vivo* experimental models that have been used previously.<sup>1,2,4,5,12-19</sup> For example, it has enabled us to separate embryonic effects of  $N_2O$  from maternal effects and to more precisely control experimental conditions. In the current study, we aimed to use this system to examine preventive effects of methionine and folinic acid against  $N_2O$ -induced teratogenicity, and to determine whether  $N_2O$ -induced situs inversus is mediated by  $\alpha_1$ -adrenergic stimulation.

## Materials and Methods

### Animals

Sprague-Dawley rats were obtained from the breeder (Bantin & Kingman, Fremont, CA), housed two per cage and provided with food and water on demand. Temperature in the animal room was maintained at 21–24°C and artificial lighting was provided between

MECHANISMS OF N<sub>2</sub>O-INDUCED TERATOGENICITY

6 AM and 6 PM each day. Timed-pregnant rats were obtained by mating the rats for 2 h between 8 AM and 10 AM.<sup>20</sup> A copulatory plug was sought immediately after mating, and the day that it was found was defined as day 0 of gestation.

#### Whole-embryo Culture

The methods that we used for removing and culturing embryos were originally established by New.<sup>21</sup> At 7 AM on day 9 of gestation, rats were anesthetized with halothane, then killed by exsanguination. Uteri were excised and individual implantation sites were harvested into a sterile Petri dish containing Hank's balanced salt solution. Egg cylinder were dissected from decidua under a dissecting microscope. The embryos were then divided into different stages of development according to a modified Theiler's staging system,<sup>22,23</sup> and only those at stage 10b (late primitive streak stage) were selected for culture. Reichert's membrane was removed from the egg cylinder starting from the side opposite to the embryonic disc after the ectoplacental cone and roof of the ectoplacental cavity had been excised.<sup>24</sup>

Embryos were randomly divided into groups as described below. Three to five embryos were placed in a single glass culture bottle (60 ml) that contained 1.5 ml per embryo of culture medium consisting of 30% pregnant rat serum, 50% male rat serum, and 20% Hank's balanced salt solution; penicillin (100 U · ml<sup>-1</sup>) and streptomycin (50 µg · ml<sup>-1</sup>) were added to each bottle to prevent bacterial growth. The rat serum used was obtained from blood that had been centrifuged immediately after collection and heat-inactivated (56°C for 30 min). Bottles were flushed for 1 min with a gas mixture of either 5% O<sub>2</sub>/5% CO<sub>2</sub>/90% N<sub>2</sub>, or 5% O<sub>2</sub>/5% CO<sub>2</sub>/75% N<sub>2</sub>O/15% N<sub>2</sub>, were capped with rubber stopcocks and rotated at 20 rpm in a 37–38°C incubator. After 24 h, all bottles were flushed with a gas mixture of 5% O<sub>2</sub>/5% CO<sub>2</sub>/90% N<sub>2</sub>. Bottles were re-flushed with a gas mixture of 20% O<sub>2</sub>/5% CO<sub>2</sub>/75% N<sub>2</sub> at 3 PM on day 10, and with a gas mixture of 95% O<sub>2</sub>/5% CO<sub>2</sub> at 6 AM on day 11. O<sub>2</sub>, CO<sub>2</sub> and N<sub>2</sub>O concentrations were monitored before and after each change of atmosphere by infrared gas spectrometry (Datex 254 airway monitor, Datex Medical Instrument, Tewksbury, MA), and recorded on a strip chart recorder.

At 10 AM on day 11 of gestation, culture was terminated and the crown-rump length and somite number of each embryo was determined. The size and shape of the head and body and the sidedness of the bulbo-ventricular loop (heart), chorioallantoic placenta, and

tail (lower part of the embryo) were recorded as in our previous study.<sup>11</sup> Embryos were designated as having situs inversus when at least one of these three asymmetric body structures was opposite to normal.

#### Experiment 1

In the first experiment, we tested preventive effects of methionine, folic acid and prazosin (α<sub>1</sub>-adrenergic antagonist) against N<sub>2</sub>O-induced teratogenicity. Five groups of embryos were cultured as follows: (1) control (no treatment), (2) N<sub>2</sub>O alone, (3) N<sub>2</sub>O plus methionine (25 µg · ml<sup>-1</sup>), (4) N<sub>2</sub>O plus folic acid (5 µg · ml<sup>-1</sup>), and (5) N<sub>2</sub>O plus prazosin (10 µM). Concentrations of methionine<sup>25,26</sup> and folic acid<sup>27</sup> were chosen to be several-fold above normal serum levels for rats. The concentration of prazosin chosen was one that completely blocked phenylephrine (α<sub>1</sub>-adrenergic agonist)-induced situs inversus in our previous studies.<sup>6,8</sup> All chemicals were purchased from Sigma Chemical (St. Louis, MO).

Statistical analyses were performed as follows. Crown-rump length and number of somite pairs were compared among groups by one-way analysis of variance, and Fisher's protected least significant difference test was used as an *a posteriori* test when differences were found with analysis of variance. Incidences of malformations and situs inversus were analyzed with a contingency table, and chi-squared analysis was used as an *a posteriori* test when there were differences. A *posteriori* tests was performed between each treatment group and both control and N<sub>2</sub>O alone groups. A *P* value less than 0.05 was considered significant.

#### Experiment 2

Exposure to N<sub>2</sub>O alone did not cause situs inversus in experiment 1. Based on the assumption that N<sub>2</sub>O-induced α<sub>1</sub>-adrenergic stimulation was not strong enough to cause situs inversus by itself, we decided to examine the effects of N<sub>2</sub>O on the dose-response of phenylephrine-induced situs inversus. The incidences of situs inversus when embryos were exposed to different concentrations of phenylephrine were first determined. The study was then repeated with 0.5, 2.5, and 50 µM concentrations of phenylephrine in the presence of 75% N<sub>2</sub>O. Based on the results, we selected 2.5 µM of phenylephrine to test whether prazosin blocks the additive effects of N<sub>2</sub>O on the incidence of phenylephrine-induced situs inversus.

Statistical comparisons were performed among the incidences of situs inversus caused by phenylephrine

alone, phenylephrine plus N<sub>2</sub>O, and phenylephrine plus N<sub>2</sub>O and prazosin with a contingency table. Chi-square analysis was used as an *a posteriori* test when there were differences. *P* value less than 0.05 was considered significant.

## Results

### Experiment 1

All 25 embryos in the control group developed normally in size and morphology (table 1). Treatment with N<sub>2</sub>O alone resulted in an increased incidence of malformations (48.4%, *n* = 31), decreased crown-rump length and decreased number of somite pairs. Malformed embryos that were less affected had small heads but normal sized bodies, whereas embryos that were most affected had both malformed heads and bodies. In general, the abnormalities produced were similar to those that we reported in a previous study.<sup>11</sup> Treatment with N<sub>2</sub>O plus folinic acid or prazosin resulted in the same pattern of malformations (table 1 and fig. 1); that is, neither folinic acid nor prazosin conferred any protection. To the contrary, treatment with N<sub>2</sub>O plus methionine resulted in almost no abnormalities (table 1 and fig. 1); that is, methionine almost completely protected the embryos from the effects of N<sub>2</sub>O.

### Experiment 2

Treatment with phenylephrine resulted in a dose-dependent increase in situs inversus that was unaccompanied by other malformations (table 2 and fig. 2). N<sub>2</sub>O increased the incidence of situs inversus when co-administered with 0.5, 2.5 and 50  $\mu$ M phenylephrine

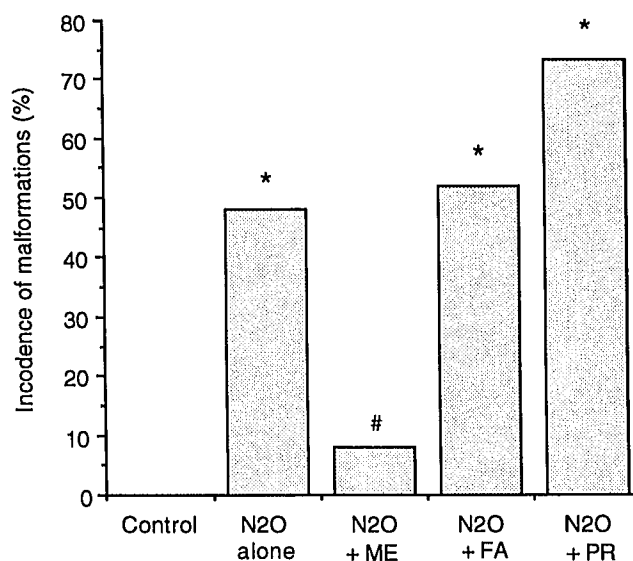

Fig. 1. Incidence of malformations induced by N<sub>2</sub>O alone and N<sub>2</sub>O plus methionine (ME), folinic acid (FA), or prazosin (PR). \*Value significantly higher than control: *P* < 0.05. #Value significantly less than N<sub>2</sub>O alone: *P* < 0.05.

(table 2 and fig. 2). The increase for the 2.5  $\mu$ M phenylephrine concentration was from 15.4% to 60.0% and was statistically significant (*P* < 0.05). Addition of 10  $\mu$ M of prazosin to the N<sub>2</sub>O/2.5  $\mu$ M phenylephrine combination significantly (*P* < 0.05) decreased the incidence of situs inversus to 20.0% (*n* = 25).

## Discussion

Currently, most investigators assume that N<sub>2</sub>O-induced teratogenicity is due solely to N<sub>2</sub>O's ability to

Table 1. Outcome for Embryos in Experiment 1

|                                                | Embryos Studied (n) | Malformed Embryos (n) | Embryos with Situs Inversus (n) | Crown-Rump Length (mm, mean $\pm$ SD) | Somites Number (mean $\pm$ SD) |
|------------------------------------------------|---------------------|-----------------------|---------------------------------|---------------------------------------|--------------------------------|
| Control                                        | 25                  | 0                     | 0                               | 3.1 $\pm$ 0.1                         | 22.8 $\pm$ 1.0                 |
| N <sub>2</sub> O alone                         | 31                  | 15 (48.4)*            | 1 (4.0)                         | 2.8 $\pm$ 0.2*                        | 20.6 $\pm$ 1.5*                |
| N <sub>2</sub> O + methionine (25 $\mu$ g/ml)  | 25                  | 2 (8.0)†              | 1 (4.0)                         | 3.1 $\pm$ 0.2†                        | 22.9 $\pm$ 1.3†                |
| N <sub>2</sub> O + folinic acid (5 $\mu$ g/ml) | 25                  | 13 (52.0)*            | 3 (12.0)                        | 2.8 $\pm$ 0.2*                        | 20.9 $\pm$ 1.3*                |
| N <sub>2</sub> O + prazosin (10 $\mu$ M)       | 15                  | 11 (73.3)*            | 0                               | 2.5 $\pm$ 0.2*                        | 19.7 $\pm$ 1.0*                |

Values in parentheses are percentages.

N<sub>2</sub>O = nitrous oxide.

N<sub>2</sub>O: 75% for the first 24 h of culture.

\* *P* < 0.05 versus control.

† *P* < 0.05 versus N<sub>2</sub>O alone.

MECHANISMS OF N<sub>2</sub>O-INDUCED TERATOGENICITY

Table 2. Outcome for Embryos in Experiment 2

|                                                                     | Embryos Studied (n) | Malformed Embryos (n) | Embryos with Situs Inversus (n) | Crown-Rump Length (mm, mean $\pm$ SD) | Somites Number (mean $\pm$ SD) |
|---------------------------------------------------------------------|---------------------|-----------------------|---------------------------------|---------------------------------------|--------------------------------|
| Phenylephrine ( $\mu$ M)                                            |                     |                       |                                 |                                       |                                |
| 0.5                                                                 | 25                  | 0                     | 1 (4.0)                         | 3.0 $\pm$ 0.2                         | 22.9 $\pm$ 0.9                 |
| 2.5                                                                 | 26                  | 0                     | 4 (15.4)                        | 3.1 $\pm$ 0.1                         | 23.1 $\pm$ 0.9                 |
| 5                                                                   | 24                  | 0                     | 9 (37.5)                        | 3.2 $\pm$ 0.1                         | 23.2 $\pm$ 0.9                 |
| 50                                                                  | 26                  | 0                     | 14 (53.8)                       | 3.1 $\pm$ 0.2                         | 23.2 $\pm$ 0.9                 |
| N <sub>2</sub> O + phenylephrine ( $\mu$ M)                         |                     |                       |                                 |                                       |                                |
| 0.5                                                                 | 25                  | 20 (80.0)             | 4 (16.0)                        | 2.6 $\pm$ 0.2                         | 20.1 $\pm$ 1.4                 |
| 2.5                                                                 | 24                  | 18 (75.0)             | 15 (60.0)*                      | 2.7 $\pm$ 0.2                         | 20.9 $\pm$ 1.1                 |
| 50                                                                  | 35                  | 28 (80.0)             | 22 (62.9)                       | 2.7 $\pm$ 0.2                         | 21.2 $\pm$ 1.2                 |
| N <sub>2</sub> O + prazosin (10 $\mu$ M) + phenylephrine ( $\mu$ M) |                     |                       |                                 |                                       |                                |
| 2.5                                                                 | 25                  | 16 (64.0)             | 5 (20.0)†                       | 2.7 $\pm$ 0.2                         | 21.2 $\pm$ 0.9                 |

Values in parentheses are percentages.

N<sub>2</sub>O = nitrous oxide.

N<sub>2</sub>O: 75% for the first 24 h of culture.

\*  $P < 0.05$  versus 2.5  $\mu$ M phenylephrine.

†  $P < 0.05$  versus N<sub>2</sub>O + 2.5  $\mu$ M phenylephrine.

oxidize vitamin B<sub>12</sub> which cannot then function as a coenzyme for methionine synthase.<sup>3</sup> This enzyme catalyzes the transmethylation from methyltetrahydrofolate and homocysteine to produce tetrahydrofolate and methionine (fig. 3). The expected result of its inhibi-

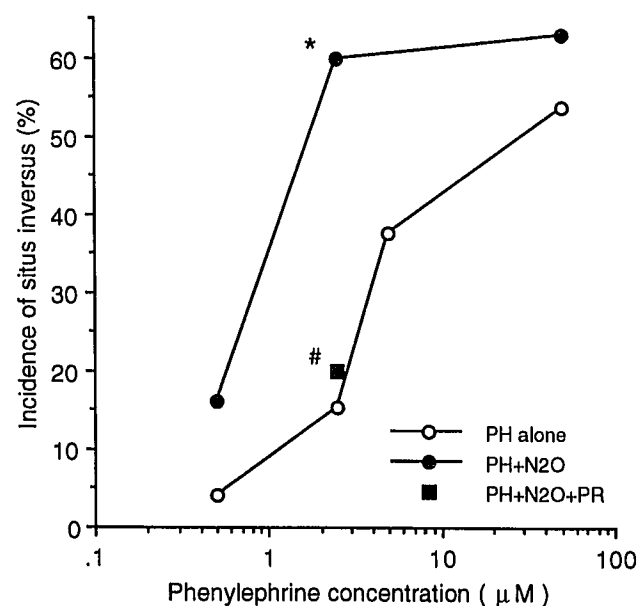

Fig. 2. Dose-response for phenylephrine (PH)-induced situs inversus, and the effects of N<sub>2</sub>O alone and N<sub>2</sub>O plus prazosin (PR). \*Value significantly higher than control:  $P < 0.05$ . #Value significantly less than N<sub>2</sub>O alone:  $P < 0.05$ .

tion is decreased tetrahydrofolate which leads to decreased thymidylate (thymidine monophosphate) and hence impaired DNA synthesis, and decreased methionine which leads to impaired methylation reactions. Significant inactivation of methionine synthase by N<sub>2</sub>O occurs rapidly in animals<sup>28,29</sup> and humans,<sup>30</sup> and is known to cause a pernicious anemia-like syndrome consisting of subacute combined degeneration of the spinal cord,<sup>31</sup> megaloblastic anemia and pancytopenia<sup>32</sup> in humans. Because the hematologic changes in humans are prevented by folinic acid (5-formyl tetrahydrofo-

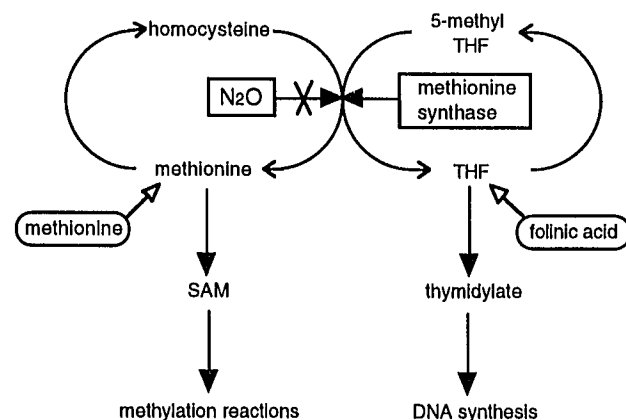

Fig. 3. Pathway of inhibition of methionine synthase by N<sub>2</sub>O and its potential metabolic consequences. SAM = S-adenosyl-methionine; THF = tetrahydrofolate.

late) administered with  $N_2O$ , presumably because DNA synthesis is restored to normal (fig. 3),<sup>33</sup> impairment of DNA synthesis has been proposed to account also for  $N_2O$ -induced teratogenicity.<sup>34</sup> Such thinking has even led to the recommendation that folic acid be administered to all pregnant women having an operation during which  $N_2O$  is likely to be administered.†

Some support for the idea that decreased DNA synthesis is the most important factor in  $N_2O$ -induced teratogenicity came from a study in which folic acid was said to prevent such an effect in rats.<sup>4</sup> However, after carefully reanalyzing their data, we concluded that preventive effects of folic acid were limited to partial protection of minor skeletal abnormalities. This conclusion has been confirmed in a similar *in vivo* study performed in our laboratory<sup>5</sup> and in the current *in vitro* study. It is also consistent with our previous findings that maximum reduction of methionine synthase activity and decrease in DNA synthesis occur at concentrations of  $N_2O$  that are well below those that produce teratogenicity.<sup>35,36</sup> It is not clear at this time why decreased tetrahydrofolate and DNA synthesis play almost no role in  $N_2O$ -induced teratogenicity. Certainly,  $N_2O$ 's effect on DNA synthesis is only partial.<sup>35,36</sup> Furthermore, it is likely that the salvage pathway for thymidylate, which is known to exist in many mammalian tissues, becomes more active in the embryo to compensate for the decreased *de novo* synthesis of thymidylate.

Until now, the role of methionine deficiency on  $N_2O$ -induced teratogenicity has been neglected. Our results suggest for the first time that it plays the major role in  $N_2O$ -induced teratogenicity. Other investigators have reported that embryos grown in methionine deficient culture medium do not develop normally, although the abnormalities produced were not exactly the same as those seen in the current study.<sup>25,26</sup> Their and our results are not surprising because methionine, *via* its activated form S-adenosylmethionine, is the principal substrate for methylation in many biochemical reactions. Nevertheless, whether impaired methylation or some other mechanism is involved in  $N_2O$ -induced teratogenicity remains to be determined.

During the past few years we have become increasingly interested in whether some aspects of  $N_2O$ 's reproductive toxicity could relate to its sympathomimetic actions. Such actions of  $N_2O$  on embryos have not been

investigated, but it is well known that  $N_2O$  causes central and peripheral sympathetic stimulation in both mature animals and humans, and that these lead to marked physiologic changes, especially of the cardiovascular system.<sup>37,38</sup> The precise cellular mechanisms by which  $N_2O$  produces these sympathetic effects are unknown although their elucidation would be helpful in the clinical management of anesthetized patients. It is known, however, that  $N_2O$  administration increases urinary catecholamine levels, plasma norepinephrine concentrations, and peripheral vascular resistance in humans.<sup>39</sup>  $N_2O$  also has been shown to increase sympathetic efferent nerve activity to vessels of skeletal muscle.<sup>40,41</sup> Using the whole-embryo culture system, we have recently demonstrated that stimulation of  $\alpha_1$  but not of  $\alpha_2$  or  $\beta$  adrenergic stimulation caused situs inversus without causing other abnormalities.<sup>6-8</sup> In the current study, situs inversus did not occur with  $N_2O$  unlike in our previous studies in which rats were obtained from different sources.<sup>10,11</sup> Nevertheless, we have demonstrated that  $N_2O$  has an additive effect on phenylephrine-induced situs inversus which is blocked by prazosin. Results from the current and previous studies suggest that  $N_2O$  stimulates  $\alpha_1$ -adrenergic receptors in the embryo, but that the effects are weak and will only result in situs inversus in susceptible animals.

In summary, using a rat whole-embryo culture system, we have demonstrated that supplemental methionine, but not folic acid, almost completely prevents  $N_2O$ -induced teratogenicity. Our results suggest for the first time that decreased methionine rather than tetrahydrofolate plays the major role in  $N_2O$ -induced teratogenicity other than situs inversus. We also have demonstrated that  $N_2O$  stimulates  $\alpha_1$ -adrenergic receptors in the embryo and may cause situs inversus in susceptible animals. Clearly,  $N_2O$ -induced teratogenicity is multifactorial. The detailed molecular mechanisms involved in the production of reproductive toxicity by lack of methionine and of situs inversus by  $\alpha_1$ -adrenergic stimulation remain to be determined.

## References

1. Fink BR, Shepard TH, Blandau RJ: Teratogenic activity of nitrous oxide. *Nature* 214:146-148, 1967
2. Shepard TH, Fink BR: Teratogenic activity of nitrous oxide in rats, *Toxicity of Anesthetics*. Edited by Fink BR. Baltimore, Williams & Wilkins, 1968, pp 308-323
3. Deacon R, Lumb M, Perry J, Chanarin I, Minty B, Halsey MJ, Nunn JF: Selective inactivation of vitamin B<sub>12</sub> in rats by nitrous oxide. *Lancet* 2:1023-1024, 1978

† Marx GF: The  $N_2O$  dilemma. *Obstetric Anesthesia Digest* 5:126-128, 1985.

MECHANISMS OF N<sub>2</sub>O-INDUCED TERATOGENICITY

4. Keeling PA, Rocke DA, Nunn JF, Monk SJ, Lumb MJ, Halsey MJ: Folinic acid protection against nitrous oxide teratogenicity in the rat. *Br J Anaesth* 58:528-534, 1986
5. Mazze RI, Fujinaga M, Baden JM: Halothane prevents nitrous oxide teratogenicity in rats, folinic acid does not. *Teratology* 38:121-127, 1988
6. Fujinaga M, Baden JM: Evidence for an adrenergic mechanism in the control of body asymmetry. *Dev Biol* 143:203-205, 1991
7. Fujinaga M, Baden JM: Critical period of rat development when sidedness of asymmetric body structures is determined. *Teratology* 44:453-462, 1991
8. Fujinaga M, Maze M, Hoffman BB, Baden JM: Activation of  $\alpha$ -1 adrenergic receptors modulates the control of left/right sidedness in rat embryos. *Dev Biol* 150:419-421, 1992
9. Fujinaga M, Mazze RI, Baden JM, Fantel AG, Shepard TH: Rat whole embryo culture: An *in vitro* model for testing nitrous oxide teratogenicity. *ANESTHESIOLOGY* 69:401-404, 1988
10. Fujinaga M, Baden JM: Effects of nitrous oxide on rat embryos grown in culture (correspondence). *ANESTHESIOLOGY* 71:991-992, 1989
11. Baden JM, Fujinaga M: Effects of nitrous oxide on day 9 rat embryos grown in culture. *Br J Anaesth* 66:500-503, 1991
12. Lane GA, Nahrwold ML, Tait AB, Taylor-Busch M, Cohen PJ, Beaudoin AR: Anesthetics as teratogens: Nitrous oxide is fetotoxic, xenon is not. *Science* 210:899-901, 1980
13. Mazze RI, Wilson AI, Rice SA, Baden JM: Reproduction and fetal development in rats exposed to nitrous oxide. *Teratology* 30:259-265, 1984
14. Mazze RI, Fujinaga M, Rice SA, Harris SB, Baden JM: Reproductive and teratogenic effects of nitrous oxide, halothane, isoflurane, and enflurane in Sprague-Dawley rats. *ANESTHESIOLOGY* 64:339-344, 1986
15. Mazze RI, Fujinaga M, Baden JM: Reproductive and teratogenic effects of nitrous oxide, fentanyl and their combination in Sprague-Dawley rats. *Br J Anaesth* 59:1291-1297, 1987
16. Fujinaga M, Baden JM, Yhap EO, Mazze RI: Reproductive and teratogenic effects of nitrous oxide, isoflurane, and their combination in Sprague-Dawley rats. *ANESTHESIOLOGY* 67:960-964, 1987
17. Fujinaga M, Baden JM, Mazze RI: Susceptible period of nitrous oxide teratogenicity in Sprague-Dawley rats. *Teratology* 40:439-444, 1989
18. Fujinaga M, Baden JM, Shepard TH, Mazze RI: Nitrous oxide alters body laterality in rats. *Teratology* 41:131-135, 1990
19. Fujinaga M, Baden JM, Suto A, Myatt JK, Mazze RI: Preventive effects of phenoxylbenzamine on nitrous oxide induced reproductive toxicity in Sprague-Dawley rats. *Teratology* 43:151-157, 1991
20. Fujinaga M, Jackson EC, Baden JM: Interlitter variability and developmental stage of day 11 rat embryos produced by overnight and morning short-period breeding regimens. *Teratology* 42:535-540, 1990
21. New DAT: Whole embryo culture and the study of mammalian embryos during organogenesis. *Biol Rev* 53:81-122, 1978
22. Fujinaga M, Baden JM: Variation in development of rat embryos at the presomite period. *Teratology* 45:661-670, 1992
23. Fujinaga M, Brown NA, Baden JM: Comparison of staging systems for the gastrulation and early neurulation period in rodents: A proposed new system. *Teratology* 46:183-190, 1992
24. Fujinaga M, Baden JM: A new method for explanting early postimplantation rat embryos for culture. *Teratology* 43:95-100, 1991
25. Coelho CND, Klein NW: Methionine and neural tube closure in cultured rat embryos: Morphological and biochemical analyses. *Teratology* 42:437-451, 1990
26. Klug S, Lewandowski C, Wildi L, Neubert D: Bovine serum: An alternative to rat serum as a culture medium for the rat whole embryo culture. *Toxicol In Vitro* 4:598-601, 1990
27. Hansen DK, Grafton TF: Lack of attenuation of valproic acid-induced effects by folinic acid in rat embryos *in vitro*. *Teratology* 43:575-582, 1991
28. Deacon R, Lumb M, Muir M, Perry J, Chanarin I, Minty B, Halsey MJ, Nunn JF: Selective inactivation of vitamin B<sub>12</sub> in rats by nitrous oxide (N<sub>2</sub>O). Vitamin B<sub>12</sub>. Edited by Zagalak B, Friedrich W Berlin, Walter de Gruyter, 1979, pp 1055-1060
29. Koblin DD, Watson JE, Deedy JE, Stokstad ELR, Eger EI: Inactivation of methionine synthetase by N<sub>2</sub>O in mice. *ANESTHESIOLOGY* 54:318-324, 1981
30. Koblin DD, Waskell L, Watson JE, Stokstad ELR, Eger EI: Nitrous oxide inactivates methionine synthetase in human liver. *Anesth Analg* 61:75-78, 1982
31. Scott JM, Wilson P, Dinn JJ, Weir DG: Pathogenesis of subacute combined degeneration: A result of methyl group deficiency. *Lancet* 8:334-340, 1981
32. Chanarin I: Cobalamins and nitrous oxide: A review. *J Clin Pathol* 33:909-916, 1980
33. O'Sullivan H, Jannings F, Ward K, McCann S, Scott JM, Weir DG: Human bone marrow biochemical function and megaloblastic hematopoiesis after nitrous oxide anesthesia. *ANESTHESIOLOGY* 55:645-649, 1981
34. Nunn JF: Clinical aspects of the interaction between nitrous oxide and vitamin B<sub>12</sub>. *Br J Anaesth* 59:3-13, 1987
35. Baden JM, Rice SA, Serra M, Kelley M, Mazze RI: Thymidine and methionine syntheses in rats exposed to nitrous oxide. *Anesth Analg* 62:738-741, 1983
36. Baden JM, Serra M, Mazze RI: Inhibition of fetal methionine synthetase by nitrous oxide. *Br J Anaesth* 56:523-526, 1984
37. Eisele JH: Cardiovascular effects of nitrous oxide, Nitrous oxide/N<sub>2</sub>O. Edited by Eger EI. New York, Elsevier, 1985, pp 125-156
38. Ebert T: Differential effects of nitrous oxide on baroreflex control of heart rate and peripheral sympathetic nerve activity in humans. *ANESTHESIOLOGY* 72:16-22, 1990
39. Eisele JH, Smith NT: Cardiovascular effects of 40 percent nitrous oxide in man. *Anesth Analg* 51:956-963, 1972
40. Millar RA, Warden JC, Cooperman LH, Price HL: Central sympathetic discharge and mean arterial pressure during halothane anesthesia. *Br J Anaesth* 41:918-927, 1969
41. Millar RA, Warden JC, Cooperman LH, Price HL: Further studies of sympathetic actions of anesthetics in intact and spinal animals. *Br J Anaesth* 42:366-378, 1970
